# Supplementary material for: Daphnoretin as a Potent Sortase A Inhibitor Effectively Disarms Drug-Resistant Staphylococcus aureus Infections
Source: Research Square preprint supplement (doi:10.21203/rs.3.rs-7820020/v1), 2025-11-03
Supplement: Supplementary file 1 [file 35ae06cd781a4874d73ee4b6.docx]

**Supporting Information**

**Daphnoretin as a Potent Sortase A Inhibitor Effectively Disarms Drug-Resistant *Staphylococcus aureus* Infections**Yun Sun1#, Tong Zhao1#, Dongbin Guo1, Peitong Jiang1, Xinyao Liu1, Zhangyu Du1, Luanbiao Sun2, Yuan Gao1, Han Gao1, Li Wang3*, Bingmei Wang1*, Ming Yan1*1College of Integrated Traditional Chinese and Western Medicine, School of Clinical Medicine, College of Pharmacy, The Third Affiliated Hospital of Changchun University of Chinese Medicine, Changchun University of Chinese Medicine, Changchun, Jilin, China.2China-Japan Union Hospital of Jilin University, Changchun, China.3Chinese Medicine Guangdong Laboratory /State Key Laboratory of Traditional Chinese Medicine Syndrome, The Second Clinical College, Guangzhou University of Chinese Medicine (Guangdong Provincial Hospital of Chinese Medicine), Guangzhou, Guangdong, China.#These authors contributed equally*Correspondence: liwang1006@126.com (Li Wang), bingmeiwang1970@163.com (Bingmei Wang), mingyan.ccucm@outlook.com (Ming Yan)

**The supplemental information includes the following:**

**Supplemental Figures 1**

**Supplemental Tables 1 to 2**

**Supplementary Figure.1 Quality test report of daphnoretin.**


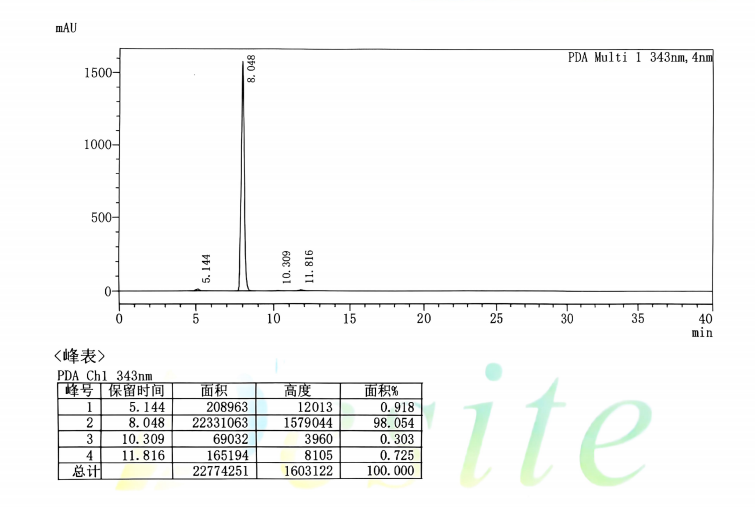


**Supplementary Figure.1 Quality test report of daphnoretin.** HPLC chromatogram of daphnoretin. The purity of daphnoretin was ≥98%.

**Supplementary Table.1 Library of compounds screened for SrtA inhibition**

| **Compound Name** | **CAS No.** | **PubChem**  **CID** | **Relative inhibition** |
| --- | --- | --- | --- |
| | Daphnoretin | | --- | | Tricarballylic acid | | Tropone | | β-D-Glucose pentaacetate | | γ-Hexalactone | | ω-Pentadecalactone | | Citronellal | | Neryl acetate | | Citronellyl acetate | | Methyl propyl disulfide | | Diphenylamine hydrochloride | | Ambroxide | | Fusidic acid | | δ-Decalactone | | Squalane | | Ethyl linolenate | | Menthyl acetate | | Atropine sulfate monohydrate | | Arecaidine hydrochloride | | Isostearic acid | | Dibutyl maleate | | 2,4,5-Trimethoxybenzoic acid | | | 2034-69-7 | | --- | | 99-14-9 | | 539-80-0 | | 604-69-3 | | 695-06-7 | | 106-02-5 | | 106-23-0 | | 141-12-8 | | 150-84-5 | | 2179-60-4 | | 537-67-7 | | 6790-58-5 | | 6990-06-3 | | 705-86-2 | | 111-01-3 | | 1191-41-9 | | 2623-23-6 | | 5908-99-6 | | 6018-28-6 | | 2724-58-5 | | 105-76-0 | | 490-64-2 | | 5281406  14925  10881  2724702  12756  235414  7794  1549025  9017  16592  68311  10857465  3000226  12810  8089  5367460  220374  656678  12305194  21859  5271569  10276 | +  -  -  -  -  -  -  -  -  -  -  -  -  -  -  -  -  -  -  -  -  - |

**#**Relative inhibition of compounds at 64 μg/mL，“+” indicates an inhibition rate ≥ 70%, while “–” indicates an inhibition rate < 70%.

| Primer name | Oligonucleotide |
| --- | --- |
| SrtA-V168A-F | 5'-TTTACCTTTTTGTTCATCTAGAGCTCCTACATCTGTAGGCTTAA  C-3' |
| SrtA-V168A-R | 5'-GTTAAGCCTACAGATGTAGGAGCTCTAGATGAACAAAAAGGT  AAA-3' |
| SrtA-N114A-F | 5'-ATGAAAGTGTGTCCTGCAATTGAAATAGCTTGATCATCTAGTG  ATTCATTTTCTTC-3' |
| SrtA-N114A -R | 5'-GAAGAAAATGAATCACTAGATGATCAAGCTATTTCAATTGCAG  GACACACTTTCAT-3' |
| SrtA-T180A-F | 5'-TTTCATTGTAATCATCACAAGTAATTAATGCTAATTGTTTATCTT TACCTTTTTGTTCATC-3' |
| SrtA-T180A-R | 5'-GATGAACAAAAAGGTAAAGATAAACAATTAGCATTAATTACTT  GTGATGATTACAATGAAA-3' |
| SrtA-K175A-F | 5'-CAAGTAATTAATGTTAATTGTTTATCTGCACCTTTTTGTTCATCT  AGAACTCCTACATCTGT-3' |
| SrtA-K175A-R | 5'-ACAGATGTAGGAGTTCTAGATGAACAAAAAGGTGCAGATAAAC AATTAACATTAATTACTTG-3' |

**Supplementary Table 2. List of primers employed in this work**
